# Supplementary material for: Deconstruction of microfibrillated cellulose into nanocrystalline cellulose rods and mesogenic phase formation in concentrated low-modulus sodium silicate solutions
Source: Springer Nature journal article supplement (doi:10.1007/s10570-019-02364-6), 2019-03-23
Supplement: MOESM1 [file 16572620]

Deconstruction of microfibrillated cellulose into nanocrystalline cellulose and formation of mesogenic phases in concentrated low modulus sodium silicate solutions

Luca Bertolla* · Ivo Dlouhý Institute of Physics of Materials AVČR, CEITEC IPM, Žižkova 22, 61662 Brno, Czechia

Eva Bartoničková Brno University of Technology, Faculty of Chemistry, Materials Research Centre, Purkyňova 464/118, 61200 Brno, Czechia

Jaromír Toušek · Jiří Nováček CEITEC – Central European Institute of Technology, Masaryk University, Kamenice 5/4A, 62500 Brno, Czechia

Petra Mácová Institute of Theoretical and Applied Mechanics of the Czech Academy of Sciences, Centre of Excellence Telč, Batelovská 485, 58856 Telč, Czechia

*Corresponding author, email: [bertolla@ipm.cz](mailto:bertolla@ipm.cz)

Strain sweep test


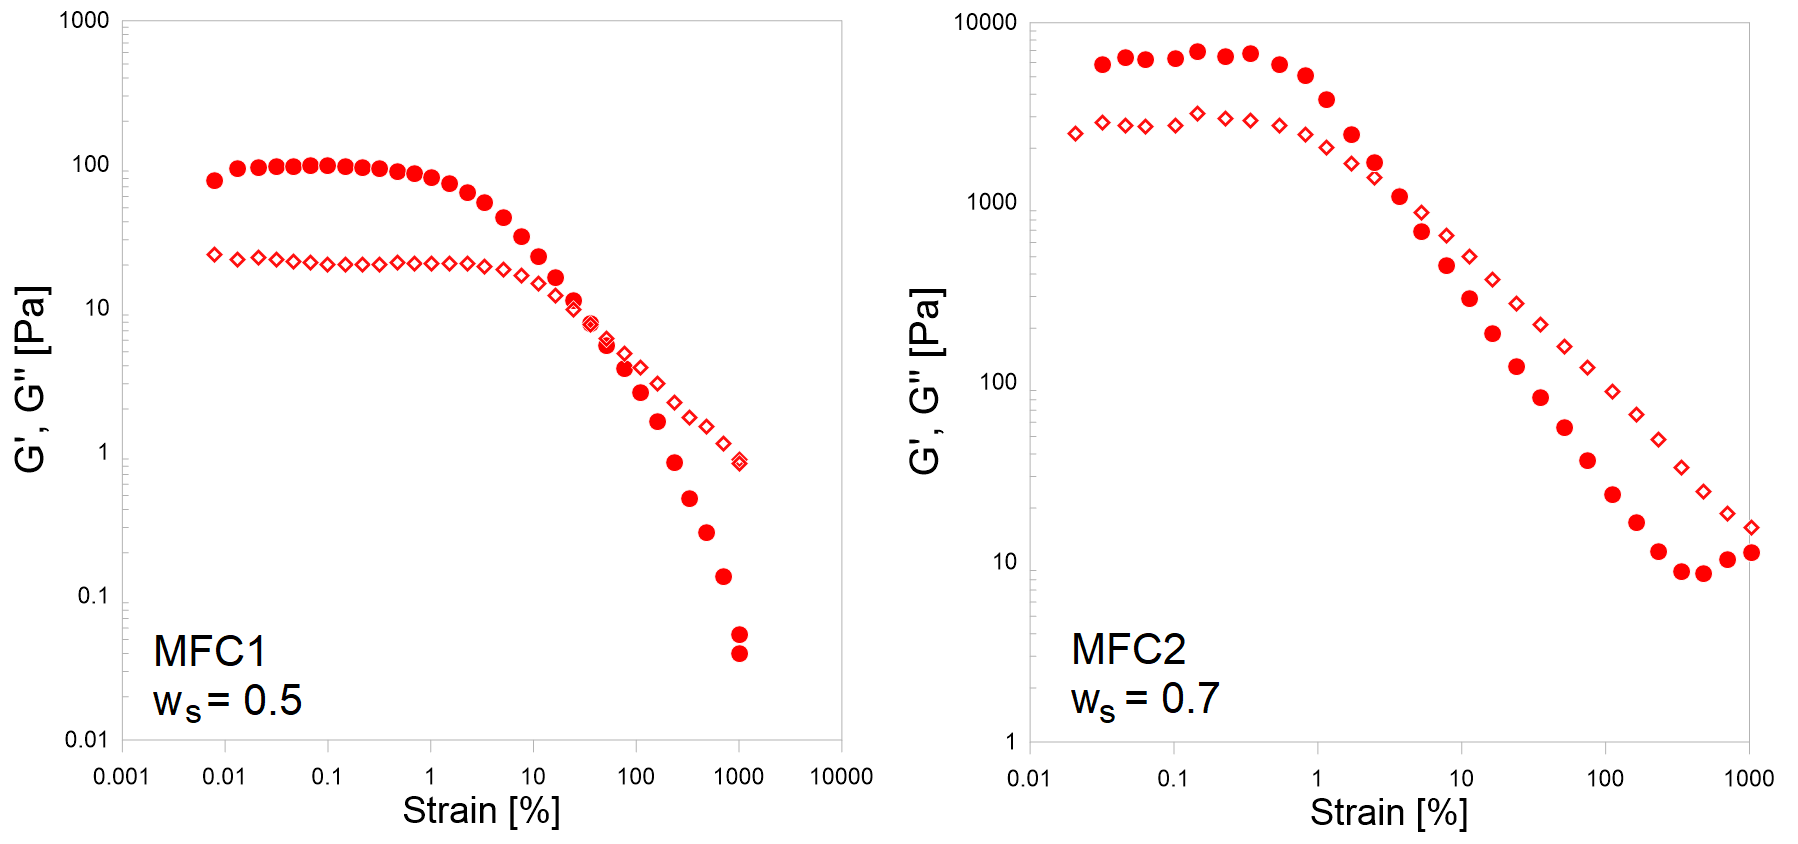


Fig. S1. Strain sweep plots obtained from the most and the least concentrated WG/MFC mixtures (MFC1, *ws* = 50%; MFC = 2, *ws* = 0.7).

Interactions between cellulosic surface and Na-silicate solution

In this section, the possible interactions taking place in the investigated cellulose-sodium silicate systems are reviewed:

1. *Na+/OH- on cellulose:*An ‘electrostatic coordination’ of cellulose hydroxyl groups to Na+ (similar like complexation/hydratation of Na+ with water molecules alone) can be expected. Another interaction is an electrostatic attraction between deprotonated hydroxyl groups on cellulose surface (RO-) acting as anions instead of OH- (water and cellulose OH groups have nearly the same acidity, hence there is an easy proton exchange OH- + ROH → HOH + RO-). Additionally, an OH- ion can also be bonded by hydrogen bridging to cellulose hydroxyls (similarly like bridging between OH- and water), thus contributing to Na+ adsorption on the cellulose surface. This latter situation is related tothe above-mentioned (ROH/OH-) proton exchange, which also helps to adsorb Na+. Generally, OH- is smaller and might easier accumulate (H-bridging) or deprotonate on the cellulose surface, while the bulkier hydrated [Na(H2O)6]+ ions (‘electrostatic complex’) are likely not to coordinate (replacement of one H2O ligand by ROH from cellulose) so easily on the bulky and structured cellulose repeat units. Hence a model of prevailing positive surface charge on cellulose is plausible (layers: cellulose/adsorbed OH-/adsorbed Na+/free solution), which would attract silicate anions to this surface. In view of the large silicate excess, adsorption (templated formation) of at least a part of larger polysilicate ions on the cellulose surface could have tremendous effects on the cellulose phase. As the synthesis was performed, there was a great excess of NaOH: cellulose made up 1–2 wt. % of the solids fraction (OH-/ROH excess = 60 and 30 for MFC1 and MFC2, respectively, see Online Resource).
2. *H-bridging between cellulose hydroxyl and silanol groups* (in analogy to water molecules) can be also expected, as well as bridging from silicate O- to cellulose-OH (ROH). The bonding of alcoholate (RO-) with SiOH, however, is unlikely to occur since SiOH is much more acidic than ROH and would hence quickly protonate RO-. The mentioned deprotonations of SiOH by contact with RO- groups also can be expected upon first contacts of silicates from solution with cellulose surface (covered by adsorbed NaOH), as well as various nucleophilic substitutions caused by RO-, e.g. polysilicate splitting, ring opening, etc. The latter substitutions lead to the literature-mentioned alkoxy bonds between cellulose and silicate. The direct silicate bonding to cellulose is expected to be dynamic, however, as the RO moiety can be ejected again in a nucleophilic substitution reaction with OH- or with another RO- group. After addition of silica, the OH- groups should have been practically all ‘neutralized by silica, except some small equilibrium concentration. At first, the excess OH-/ROH excess falls by the factor of 10 to OH-/ROH = 6 or 3, for MFC1 and MFC2, respectively; later the amount of free OH- further decreases due to reactions with silicate ions). Due to the vast initial excess OH-/ROH-cellulose, most of the initial depolymerisation steps during the silica dissolution occur in the free solution. As the concentration of OH- groups decreases via neutralization with SiO2, however, the OH- groups which are enriched (together with Na+) on cellulose surface in MFC1 and MFC2, apparently play an important role in the final redistribution reactions of the silicate anions, which then likely take place on the cellulose surface and are strongly influenced by silicate-cellulose interactions (at the conditions of small OH- concentrations). The ratio of the silicate-tetrahedra-repeat-units to cellulose hydroxyl units (ROH) is (and persists) very large, namely 55 and 27.4 (for MFC1 and MFC2, respectively), which means that the interference of cellulose with the silicate ions’ reorganization reactions is very significant, in view of the trends visible in FTIR and NMR spectra. The OH- ion has complex effects on the silicates, which also depend on mixture concentration and eventual OH- excess: it can split the polysilicates to smaller ones (nucleophilic attack), but also deprotonate them and catalyse their polycondensation (at not too high OH- excess).
3. *CO2/carbonate effect*: the incorporation of cellulose was connected with CO2 absorption (under chemical reaction), which was becoming more prominent with increasing cellulose content. The main effect seems to be the acidification of the silicates and the resulting follow-on reactions. In MFC1, the ‘cellulose-surface-effect’ seems still to predominate, while in MFC2, the acidification by CO2 reverses some trends concerning silicate ions distribution (which is visible both in FTIR and 29Si-NMR).

Treatment of MFC with NaOH


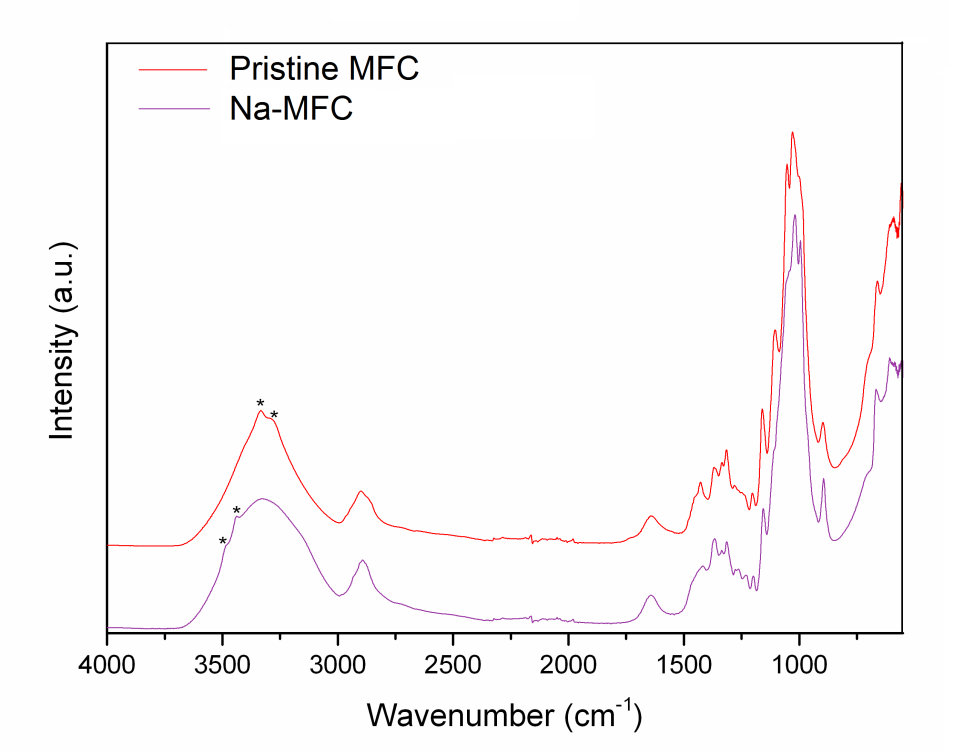


Fig. S2. FTIR spectra (4000–550 cm-1) for untreated MFC and NaOH treated MFC pointing to the transformation from CellI to CellII.


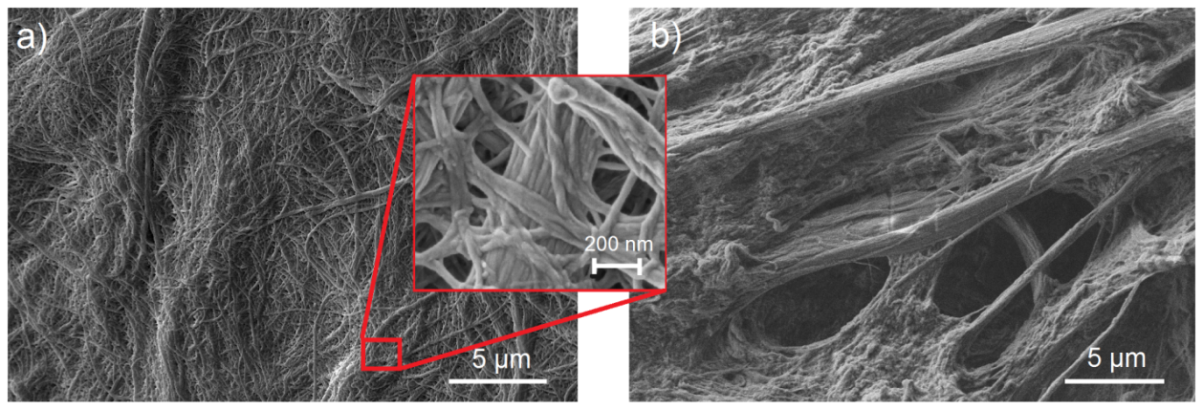


Fig. S3. Morphological comparison between pristine MFC (a) and NaOH-MFC (b).

XRD


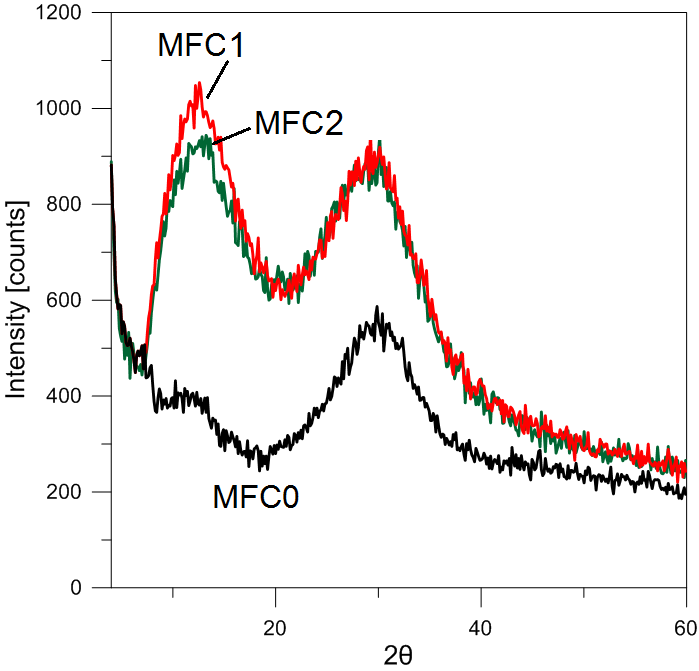


Fig. S4. XRD diffraction patterns of pure WG (MFC0) and the investigated WG/MFC mixtures (MFC1/2) pointing to a prevalently amorphous structure.

Identification of the dilution regime (Doi-Edwards)

For an aqueous electrolyte-free suspension of CNCs, the Doi-Edwards theory (Doi and Edwards 1986) predicts that the nematic alignment is solely determined by the CNCs volumetric concentration (*ϕCNC*) and aspect ratio (*LCNC/dCNC*). By defining the value of number of rods per unit volume of solution as *ν = ϕCNC/(π/4)·dCNC2LCNC*, four dilution regimes corresponding to four orientation were identified: 1) dilute (ν < 1/L3), semidilute (1/*L*3 < ν < 1/d*L*2), concentrated (ν > 1/*dL*2) and nematic (*ν*> 4/*dL*2). The diluted state is characterized by negligible interfibrillar forces, as compared with the hydrodynamic ones: CNCs are free to rotate without interference with the neighbouring ones and their rotary diffusivity *DCNC* can be expressed by the Stokes-Einstein equation, being governed by Brownian diffusion (Doi and Edwards 1986):

|  | (S1) |
| --- | --- |

where *kB* is the Boltzmann constant, *T* is the temperature and *ηs*is the viscosity of the suspending medium (i.e. the alkali silicate solution, for simplicity assumed as a continuous and homogeneous medium). In the semidilute regime the molecular rotations are strongly impeded and the rotary diffusivity becomes: (Doi and Edwards 1986):

|  | (S2) |
| --- | --- |

where *A* is a dimensionless constant, whose values are have been found to be roughly ~ 200 for nanorods (Zhang et al. 2012). In order to find *ϕCNC*, the weight fraction of CNCs (*wCNC*) on the suspension mass (Mtot) was defined first:

|  | (S3) |
| --- | --- |

By combining Eq. S3 with Eq. 2 and 3 and approximating *MWG* ~ *Msol* for *wMFC* = 0.01, 0.02, *wCNC* can be expressed as:

|  | ((S4) |
| --- | --- |

By assuming the density of a single CNC (*ρCNC*) as 1.58 g·cm-3 from (Sun 2005), *ϕCNC* is calculated by means of the rule of mixture:

|  | (S5) |
| --- | --- |

where *ρWG* is the density of the WG at a given *ws* (Fig. S5). The calculated *ν*, *D´CNC* values for all the investigated WG/MFC systems are collected in Tab. S1.

Tab. S1. Identification of the dilution regime according the Doi-Edwards theory, by neglecting the excluded volume effect due to the silicate units: *ϕ*CNC and *D´CNC* values for the studied WG-MFC suspensions are summarized.

| ***Sample*** | ***ws***  [-] | ***wMFC***  [-] | ***ws***  [-] | ***wCNC***  [-] | ***ϕCNC***  [-] | ***ν***  [m-3] | ***D´CNC***  [m2·s-1] |
| --- | --- | --- | --- | --- | --- | --- | --- |
| MFC1 | 0.5 | 0.01 | 0.5 | 0.005 | 0.0047 | 9.24·1019 | 5.08·104 |
|  | 0.6 | 0.01 | 0.6 | 0.006 | 0.0051 | 1.20·1020 | 1.83·104 |
|  | 0.7 | 0.01 | 0.7 | 0.007 | 0.0052 | 1.44·1020 | 1.62·101 |
| MFC2 | 0.5 | 0.02 | 0.5 | 0.010 | 0.0094 | 1.85·1020 | 3.23·103 |
|  | 0.6 | 0.02 | 0.6 | 0.012 | 0.0101 | 2.40·1020 | 2.34·102 |
|  | 0.7 | 0.02 | 0.7 | 0.014 | 0.0104 | 2.87·1020 | 1.06·101 |

When *ηs* is replaced by the *η* values at = 0.01s-1 measured for MFC0 (Tab. 3), *D´CNC* drops by four and three orders of magnitude as *ws* increases from 0.5 to 0.7 for MFC1 and MFC2, respectively.


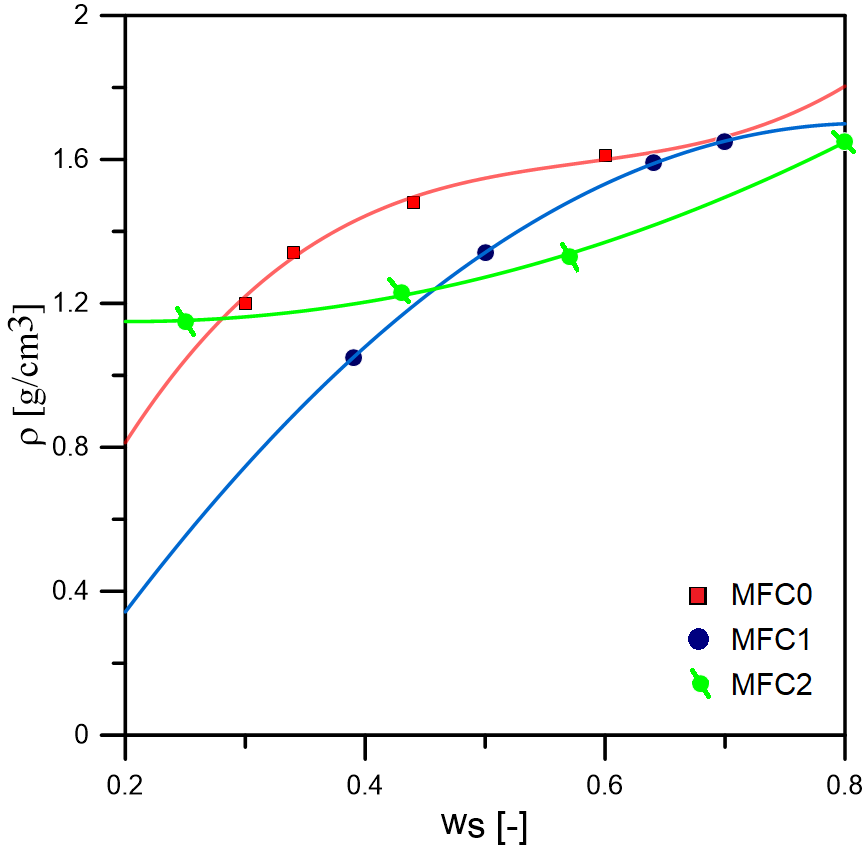


Fig. S5. Density of WG, MFC1 and MFC2 samples as a function of *ws*.
